# Supplementary material
Source: ML conference proceedings conference paper supplement (https://openreview.net/forum?id=wgGlLBIJ6h)
Supplement: supplementary_material [file 16080_supp.pdf › supp_16080/16080_supp.pdf]

## A APPENDIX

### A.1 IMPLEMENTATION DETAILS

Our framework is implemented in PyTorch, using the RealTime4DGS codebase as the foundation. To assess the versatility of our method, we did not apply dataset-specific tuning; instead, a unified training schedule was adopted across all datasets. For the optimization of 4D Gaussians, we strictly follow the official RealTime4DGS implementation. The Adam optimizer is employed throughout. The learning rate for each feature plane starts at  $1.6 \times 10^{-3}$  and exponentially decays to  $1.6 \times 10^{-4}$ . The tiny MLP decoder is trained with an initial learning rate of  $1.6 \times 10^{-4}$ , which decays to  $1.6 \times 10^{-5}$ . In the distortion field, we configure the base resolution of the spatial axes to 64. The basis resolution for temporal axis is set according to the total number of frames in the training sequence, while the pose axis is set to the number of generated views. For the multi-resolution feature structure, we employ a scale factor of 2 for each feature plane. We also find that expanding this factor from 2 to [2,4] will contribute to rendering quality at the expense of higher training cost. To stabilize the optimization process, we introduce a warm-up stage during the first 1000 iterations. In this phase, only the 4D Gaussian primitives are optimized, while both the distortion field and camera pose optimization remain frozen. After this warm-up stage, joint optimization over the distortion field, camera poses, and Gaussian attributes is enabled. This staged training scheme prevents instability in the early iterations and ensures smoother convergence.

### A.2 ADDITIONAL EVALUATION RESULTS

As described in the main paper, we conduct novel view synthesis experiments on the Neural 3D Video, Technicolor, and Nvidia Dynamic Scenes, comparing our method with HyperReel, 4DGaussians, 4DRotor, RealTime4DGS, and MonoFusion with ground-truth poses. In this section, we provide more detailed quantitative and qualitative results in Sec. A.2.1 and Sec. A.2.2, respectively.

#### A.2.1 PER-SCENE BREAKDOWN RESULTS

In Tab. 5, Tab. 4, and Tab. 6, we provide a breakdown of the metrics for different scenes in the Neural 3D Video, Technicolor, and Nvidia Dynamic Scenes datasets, respectively. As shown in the quantitative results, our method demonstrates clear superiority over the other five approaches. This indicates that our method effectively leverages the generated priors while mitigating the inconsistency they may introduce. In addition, since our evaluation is conducted on all cameras excluding those used for training, we provide more detailed per-camera metrics, as reported in Tab. 7-??.

#### A.2.2 ADDITIONAL QUALITATIVE RESULTS

In Fig. 8, Fig. 9-12, and Fig. 14, 13, we showcase additional rendering comparisons with those methods aforementioned at different timesteps. Our method consistently recovers high-quality and coherent renderings over time, demonstrating its effectiveness in dynamic scenes with sparse observation. Please zoom in for more details.

### A.3 EFFICIENCY COMPARISON WITH REALTIME4DGS

Since our implementation is based on the RealTime4DGS codebase, we compare our method against it in terms of rendering fps to further evaluate efficiency. As shown in Tab ??, our approach maintains almost the same real-time rendering speed as RealTime4DGS. Notably, the proposed distortion field is discarded after training, so inference complexity remains comparable to RealTime4DGS.

### A.4 MORE DETAILS FOR GENERATED IMAGES

In our main experiments, we adopt ViewCrafter to provide additional observations, from which 20–25 generated views are uniformly sampled for training. ViewCrafter conditions its diffusion model on point-cloud renderings obtained from Dust3R, given two input images along with the target trajectory. However, we find that the quality of generated images is highly dependent on the quality of the point-cloud renderings. To improve the generation quality, we replace Dust3r with a stronger 3D foundation model, VGGT, to produce more reliable conditioning signals. Despite this

Table 4: PSNR, SSIM, and LPIPS of our framework on Technicolor, with cam00, cam09 and cam15 served as training views.

| Technicolor - PSNR |        |         |       |          |         |         |
|--------------------|--------|---------|-------|----------|---------|---------|
|                    | Fabien | Theater | Train | Birthday | Painter | Average |
| HyperReel          | 13.62  | 14.24   | 15.44 | 12.28    | 15.13   | 14.14   |
| 4DGaussians        | 18.31  | 17.53   | 16.72 | 11.97    | 16.48   | 16.20   |
| 4DRotor            | 15.21  | 16.00   | 14.01 | 12.42    | 16.62   | 14.85   |
| RealTime4DGS       | 13.00  | 16.27   | 16.59 | 18.45    | 18.76   | 16.53   |
| MonoFusion         | 17.86  | 19.48   | 15.12 | 16.47    | 20.92   | 17.97   |
| Ours               | 25.23  | 22.44   | 21.56 | 20.11    | 26.39   | 23.15   |

  

| Technicolor - SSIM |        |         |       |          |         |         |
|--------------------|--------|---------|-------|----------|---------|---------|
|                    | Fabien | Theater | Train | Birthday | Painter | Average |
| HyperReel          | 0.653  | 0.434   | 0.351 | 0.341    | 0.484   | 0.453   |
| 4DGaussians        | 0.704  | 0.552   | 0.435 | 0.335    | 0.499   | 0.505   |
| 4DRotor            | 0.625  | 0.479   | 0.270 | 0.307    | 0.450   | 0.426   |
| RealTime4DGS       | 0.520  | 0.451   | 0.438 | 0.586    | 0.556   | 0.510   |
| MonoFusion         | 0.737  | 0.590   | 0.392 | 0.524    | 0.648   | 0.578   |
| Ours               | 0.814  | 0.686   | 0.656 | 0.683    | 0.802   | 0.728   |

  

| Technicolor - LPIPS |        |         |       |          |         |         |
|---------------------|--------|---------|-------|----------|---------|---------|
|                     | Fabien | Theater | Train | Birthday | Painter | Average |
| HyperReel           | 0.514  | 0.666   | 0.595 | 0.664    | 0.642   | 0.616   |
| 4DGaussians         | 0.492  | 0.539   | 0.546 | 0.620    | 0.564   | 0.552   |
| 4DRotor             | 0.574  | 0.571   | 0.589 | 0.612    | 0.560   | 0.581   |
| RealTime4DGS        | 0.614  | 0.623   | 0.505 | 0.437    | 0.529   | 0.542   |
| MonoFusion          | 0.415  | 0.380   | 0.356 | 0.339    | 0.271   | 0.352   |
| Ours                | 0.340  | 0.379   | 0.264 | 0.274    | 0.236   | 0.299   |

improvement, the generated sequences still exhibit spatio-temporal inconsistencies that hinder their direct use for 4D reconstruction, as illustrated in Fig 7.

As for the ablation study with ReCamMaster, unlike ViewCrafter, which leverages point-cloud renderings as trajectory priors, ReCamMaster directly conditions on camera parameters to generate a video sequence of 81 frames. Without explicit geometric constraints, the generated images from vanilla ReCamMaster suffer from severe hallucinations, making them unsuitable for reconstruction. To address this, we finetune ReCamMaster by incorporating point-cloud renderings as an additional conditioning signal, analogous to ViewCrafter.

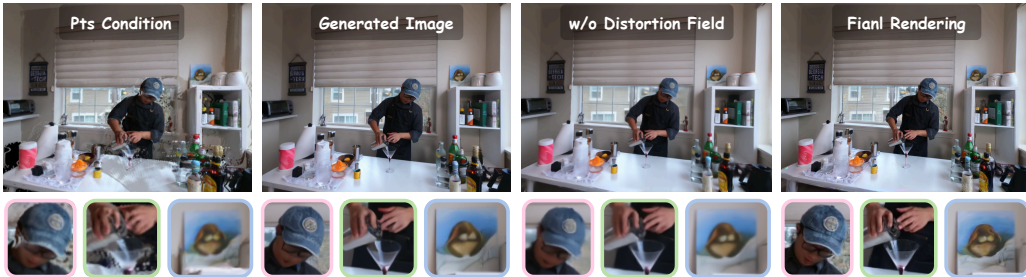

Figure 7: Visualization of the point-cloud rendering condition, generation prior, and rendering results w/ or w/o the proposed distortion field. As illustrated below, the generated image exhibit obvious distortions, which introduce blurring, geometric warping, and loss of fine details in the reconstruction results. In contrast, our spatio-temporal distortion field effectively eliminates these degradations, leading to sharper, geometrically accurate, and detail-rich renderings.

Table 5: PSNR, SSIM, and LPIPS of our framework on Neural 3D Video, with cam01, cam05 and cam10 served as training views.

| Neural 3D Video - PSNR |                |              |                  |              |             |            |         |
|------------------------|----------------|--------------|------------------|--------------|-------------|------------|---------|
|                        | coffee martini | cook spinach | cut roasted beef | flame salmon | flame steak | sear steak | Average |
| HyperReel              | 14.07          | 16.44        | 17.04            | 10.64        | 17.57       | 17.28      | 15.63   |
| 4DGaussians            | 14.49          | 17.94        | 18.34            | 14.83        | 19.53       | 18.57      | 17.40   |
| 4DRotor                | 15.86          | 19.65        | 18.51            | 16.10        | 19.69       | 19.05      | 18.20   |
| RealTime4DGS           | 15.07          | 17.95        | 17.04            | 14.65        | 19.57       | 18.86      | 17.31   |
| MonoFusion             | 15.59          | 19.71        | 19.15            | 15.42        | 20.02       | 19.91      | 18.43   |
| Ours                   | 18.40          | 23.93        | 22.43            | 18.92        | 23.30       | 23.56      | 21.91   |

  

| Neural 3D Video - SSIM |                |              |                  |              |             |            |         |
|------------------------|----------------|--------------|------------------|--------------|-------------|------------|---------|
|                        | coffee martini | cook spinach | cut roasted beef | flame salmon | flame steak | sear steak | Average |
| HyperReel              | 0.520          | 0.586        | 0.635            | 0.452        | 0.644       | 0.633      | 0.582   |
| 4DGaussian             | 0.593          | 0.664        | 0.696            | 0.611        | 0.736       | 0.716      | 0.673   |
| 4DRotor                | 0.649          | 0.741        | 0.715            | 0.651        | 0.753       | 0.744      | 0.708   |
| RealTime4DGS           | 0.590          | 0.670        | 0.640            | 0.569        | 0.708       | 0.700      | 0.649   |
| MonoFusion             | 0.643          | 0.780        | 0.777            | 0.630        | 0.788       | 0.784      | 0.738   |
| Ours                   | 0.729          | 0.832        | 0.792            | 0.726        | 0.820       | 0.818      | 0.789   |

  

| Neural 3D Video - LPIPS |                |              |                  |              |             |            |         |
|-------------------------|----------------|--------------|------------------|--------------|-------------|------------|---------|
|                         | coffee martini | cook spinach | cut roasted beef | flame salmon | flame steak | sear steak | Average |
| HyperReel               | 0.540          | 0.499        | 0.447            | 0.604        | 0.466       | 0.459      | 0.500   |
| 4DGaussians             | 0.401          | 0.320        | 0.325            | 0.362        | 0.258       | 0.270      | 0.320   |
| 4DRotor                 | 0.406          | 0.334        | 0.359            | 0.371        | 0.334       | 0.336      | 0.357   |
| RealTime4DGS            | 0.471          | 0.428        | 0.459            | 0.485        | 0.405       | 0.412      | 0.442   |
| MonoFusion              | 0.367          | 0.228        | 0.236            | 0.354        | 0.229       | 0.231      | 0.270   |
| Ours                    | 0.298          | 0.232        | 0.259            | 0.291        | 0.237       | 0.238      | 0.258   |

Table 6: PSNR, SSIM, and LPIPS of our framework on Nvidia Dynamic Scenes, with cam01, cam06 and cam10 as training views.

| Nvidia Dynamic Scenes - PSNR |         |          |          |            |         |          |         |
|------------------------------|---------|----------|----------|------------|---------|----------|---------|
|                              | jumping | balloon1 | balloon3 | playground | skating | umbrella | Average |
| HyperReel                    | 24.45   | 15.46    | 22.58    | 15.41      | 21.05   | 24.74    | 19.88   |
| 4DGaussians                  | 17.38   | 16.96    | 14.56    | 12.75      | 19.70   | 19.52    | 16.81   |
| 4DRotor                      | 21.90   | 14.55    | 20.33    | 10.95      | 26.28   | 22.29    | 19.38   |
| RealTime4DGS                 | 17.85   | 18.36    | 19.07    | 13.96      | 18.52   | 19.71    | 17.91   |
| MonoFusion                   | 20.72   | 20.31    | 19.81    | 16.86      | 23.55   | 20.07    | 20.22   |
| Ours                         | 24.36   | 25.31    | 25.33    | 19.64      | 28.73   | 25.42    | 24.81   |

  

| Nvidia Dynamic Scenes - SSIM |         |          |          |            |         |          |         |
|------------------------------|---------|----------|----------|------------|---------|----------|---------|
|                              | jumping | balloon1 | balloon3 | playground | skating | umbrella | Average |
| HyperReel                    | 0.782   | 0.350    | 0.632    | 0.281      | 0.669   | 0.629    | 0.528   |
| 4DGaussians                  | 0.525   | 0.372    | 0.264    | 0.166      | 0.607   | 0.299    | 0.372   |
| 4DRotor                      | 0.731   | 0.311    | 0.497    | 0.137      | 0.814   | 0.556    | 0.508   |
| RealTime4DGS                 | 0.585   | 0.533    | 0.509    | 0.267      | 0.649   | 0.333    | 0.479   |
| MonoFusion                   | 0.687   | 0.563    | 0.542    | 0.499      | 0.819   | 0.428    | 0.590   |
| Ours                         | 0.793   | 0.810    | 0.791    | 0.672      | 0.906   | 0.794    | 0.794   |

  

| Nvidia Dynamic Scenes - LPIPS |         |          |          |            |         |          |         |
|-------------------------------|---------|----------|----------|------------|---------|----------|---------|
|                               | jumping | balloon1 | balloon3 | playground | skating | umbrella | Average |
| HyperReel                     | 0.256   | 0.537    | 0.266    | 0.491      | 0.450   | 0.238    | 0.396   |
| 4DGaussians                   | 0.454   | 0.473    | 0.609    | 0.608      | 0.449   | 0.498    | 0.516   |
| 4DRotor                       | 0.245   | 0.601    | 0.392    | 0.670      | 0.166   | 0.260    | 0.389   |
| RealTime4DGS                  | 0.450   | 0.371    | 0.380    | 0.499      | 0.422   | 0.432    | 0.426   |
| MonoFusion                    | 0.241   | 0.151    | 0.174    | 0.206      | 0.134   | 0.248    | 0.192   |
| Ours                          | 0.170   | 0.127    | 0.142    | 0.190      | 0.121   | 0.148    | 0.150   |



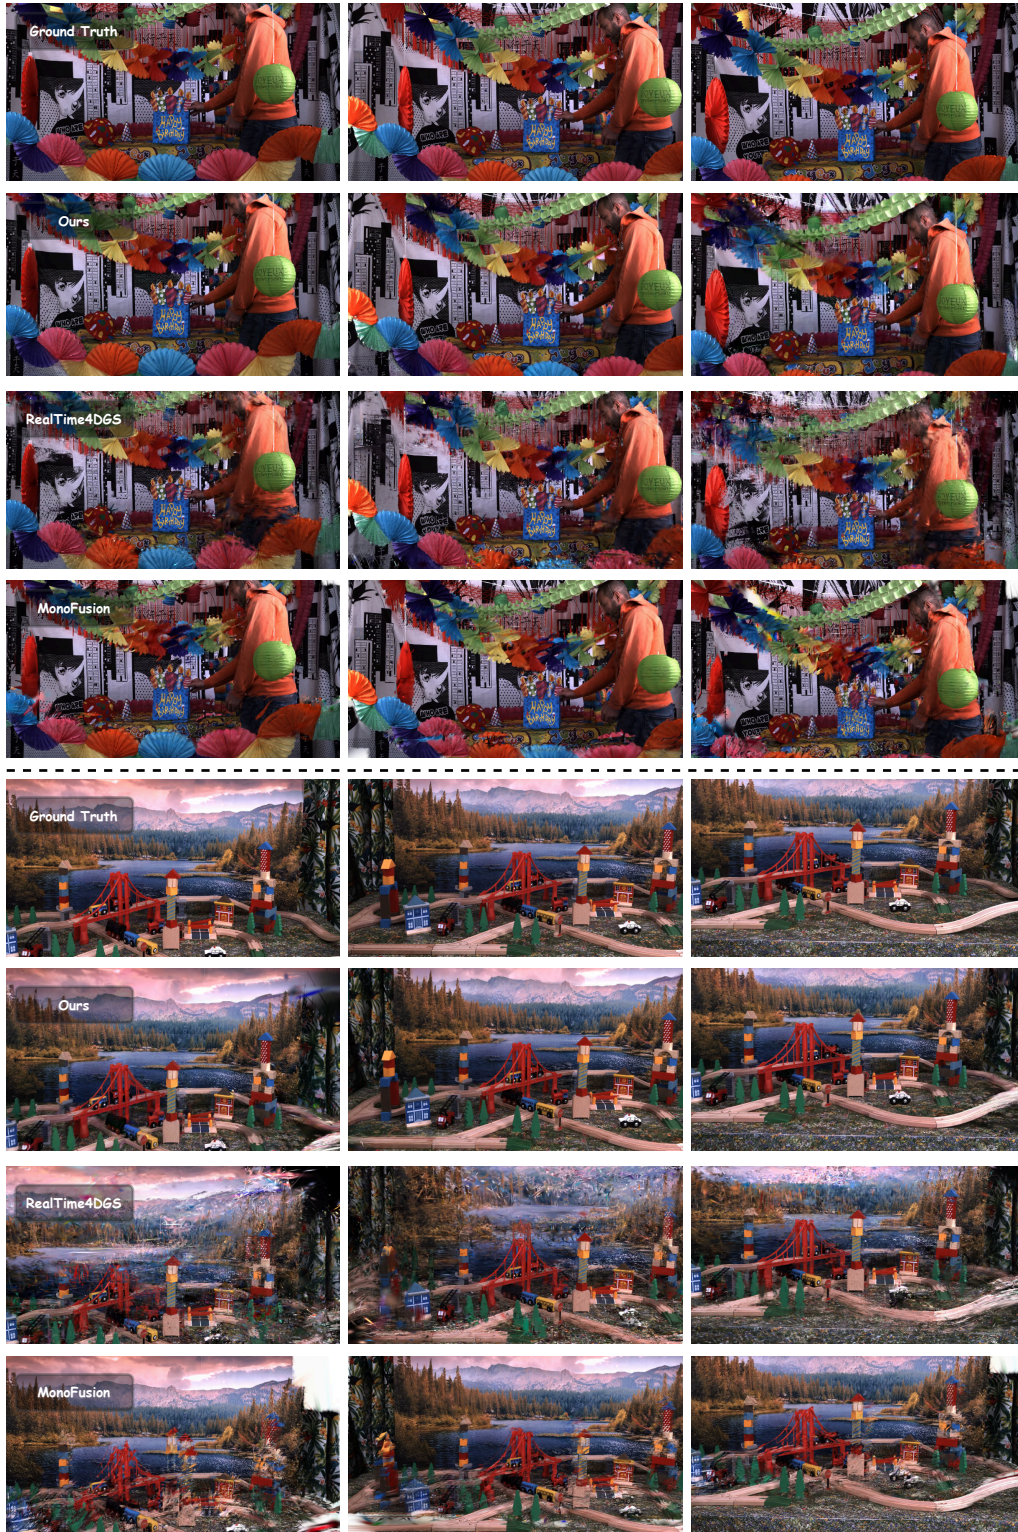

Figure 8: **Additional qualitative comparison results on *Technicolor* Dataset.** We highlight the geometric completeness of background structures, bottom decorations, and the red bridge across different viewpoints, as well as the temporal consistency of dynamic regions such as human faces, the ‘Happy Birthday’ text, and the toy train.



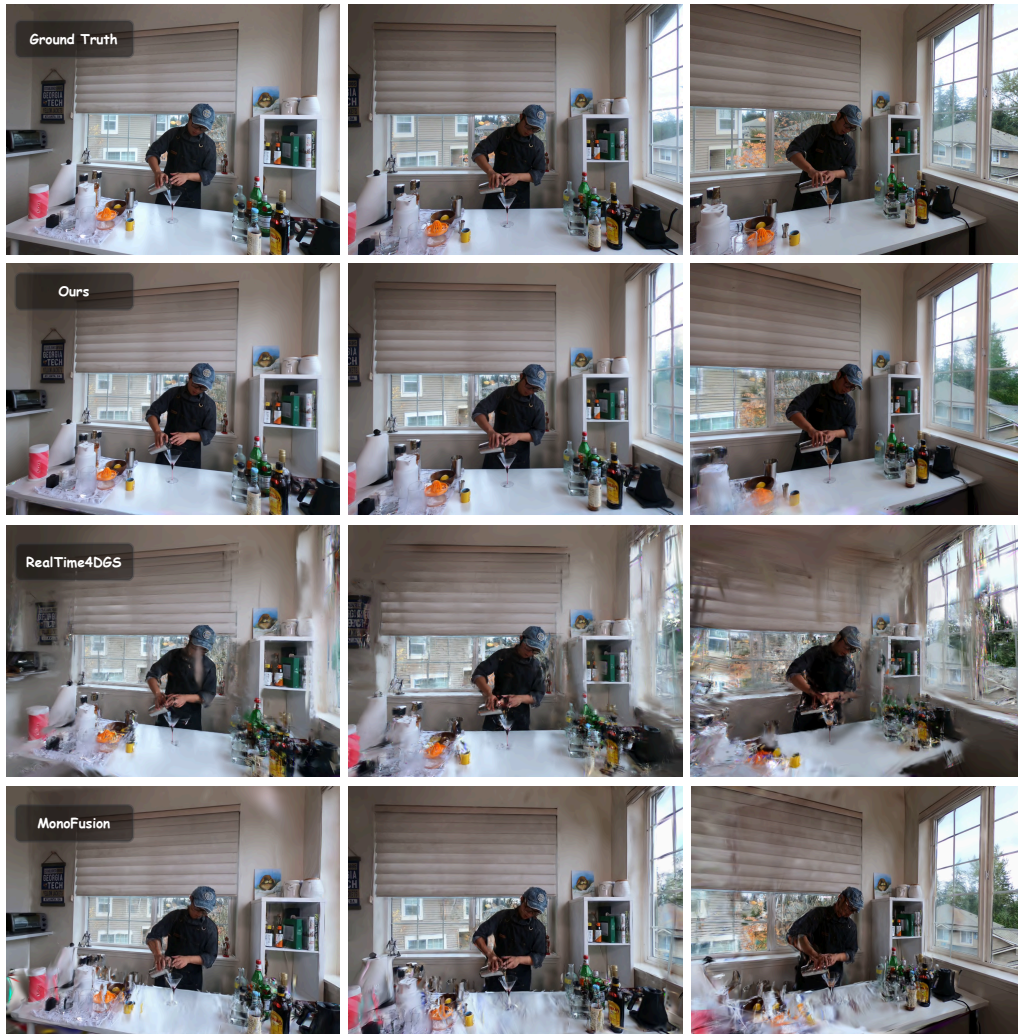

Figure 9: Additional qualitative comparison results on *Neural 3D Video Dataset* (part I).

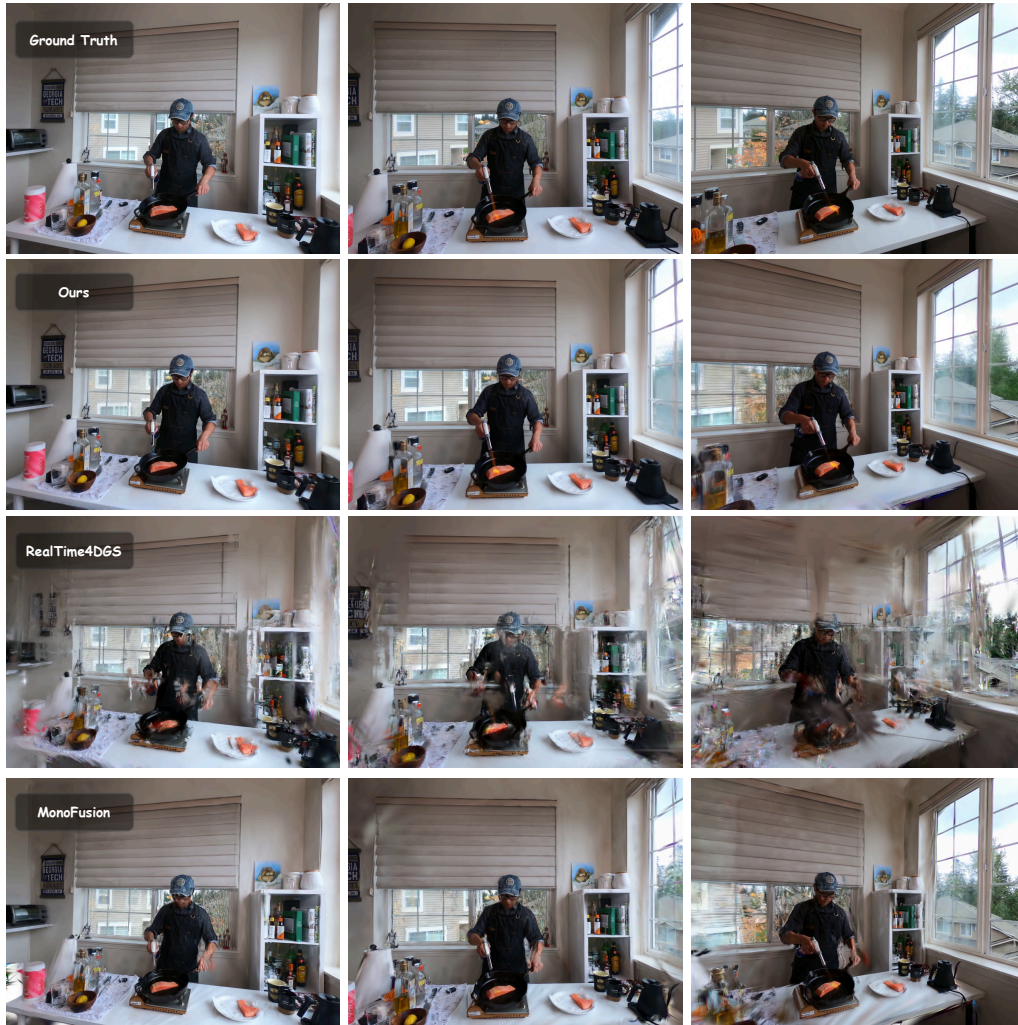

Figure 10: Additional qualitative comparison results on *Neural 3D Video Dataset* (part II).



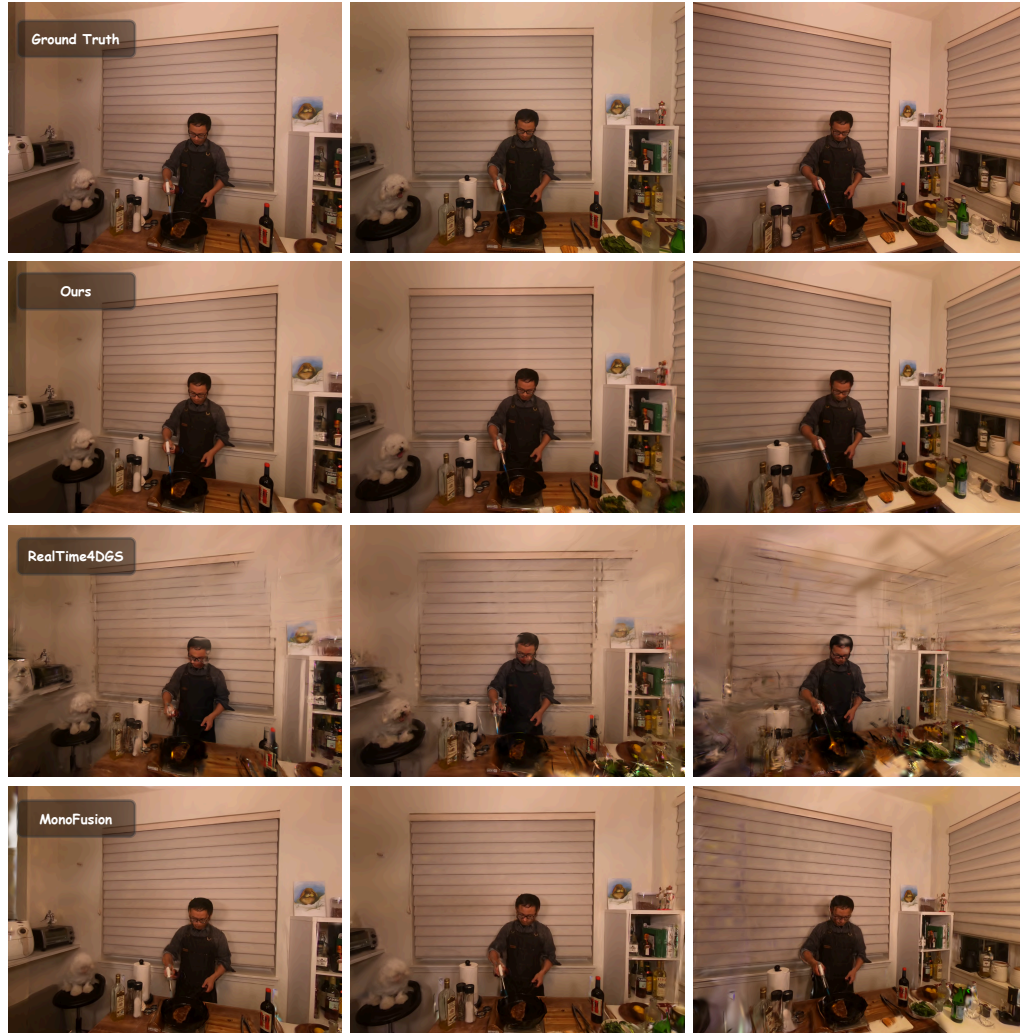

Figure 11: Additional qualitative comparison results on *Neural 3D Video Dataset* (part III).



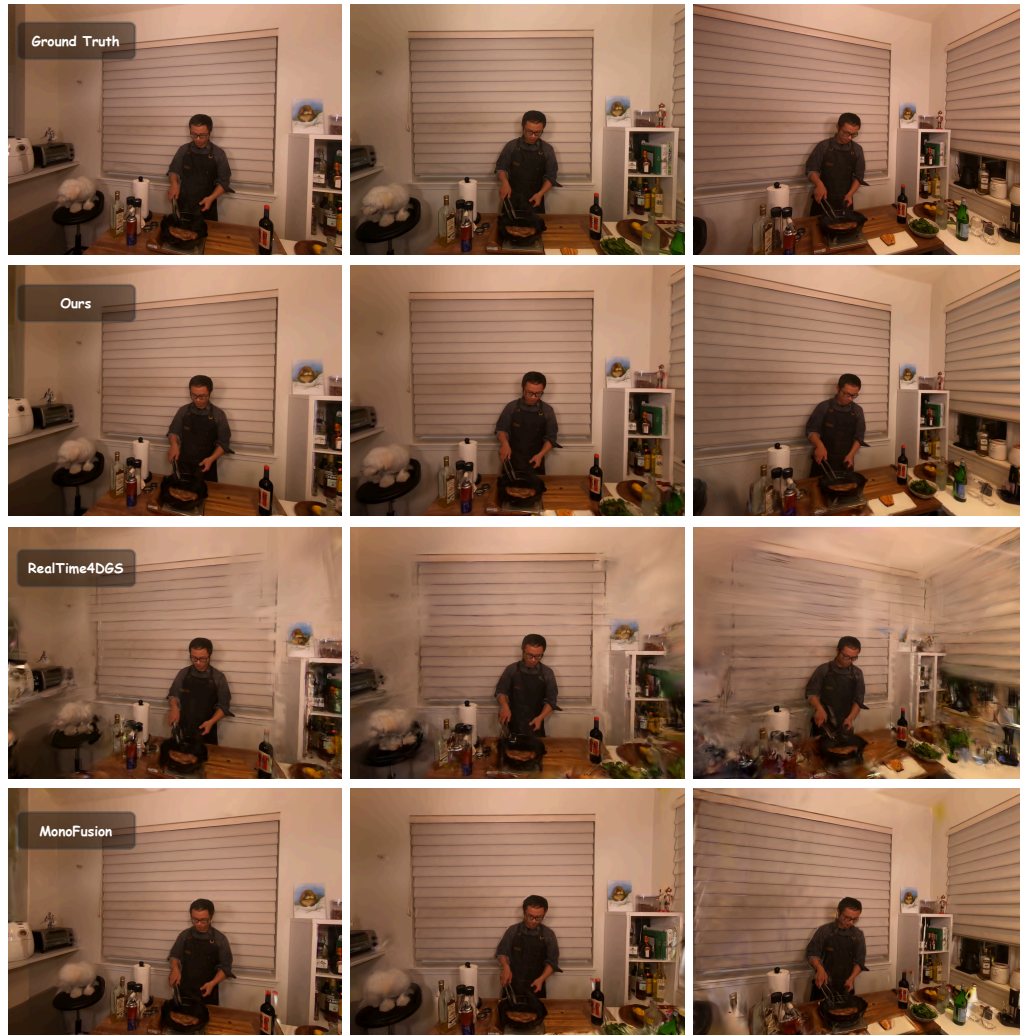

Figure 12: Additional qualitative comparison results on *Neural 3D Video Dataset* (part IV).



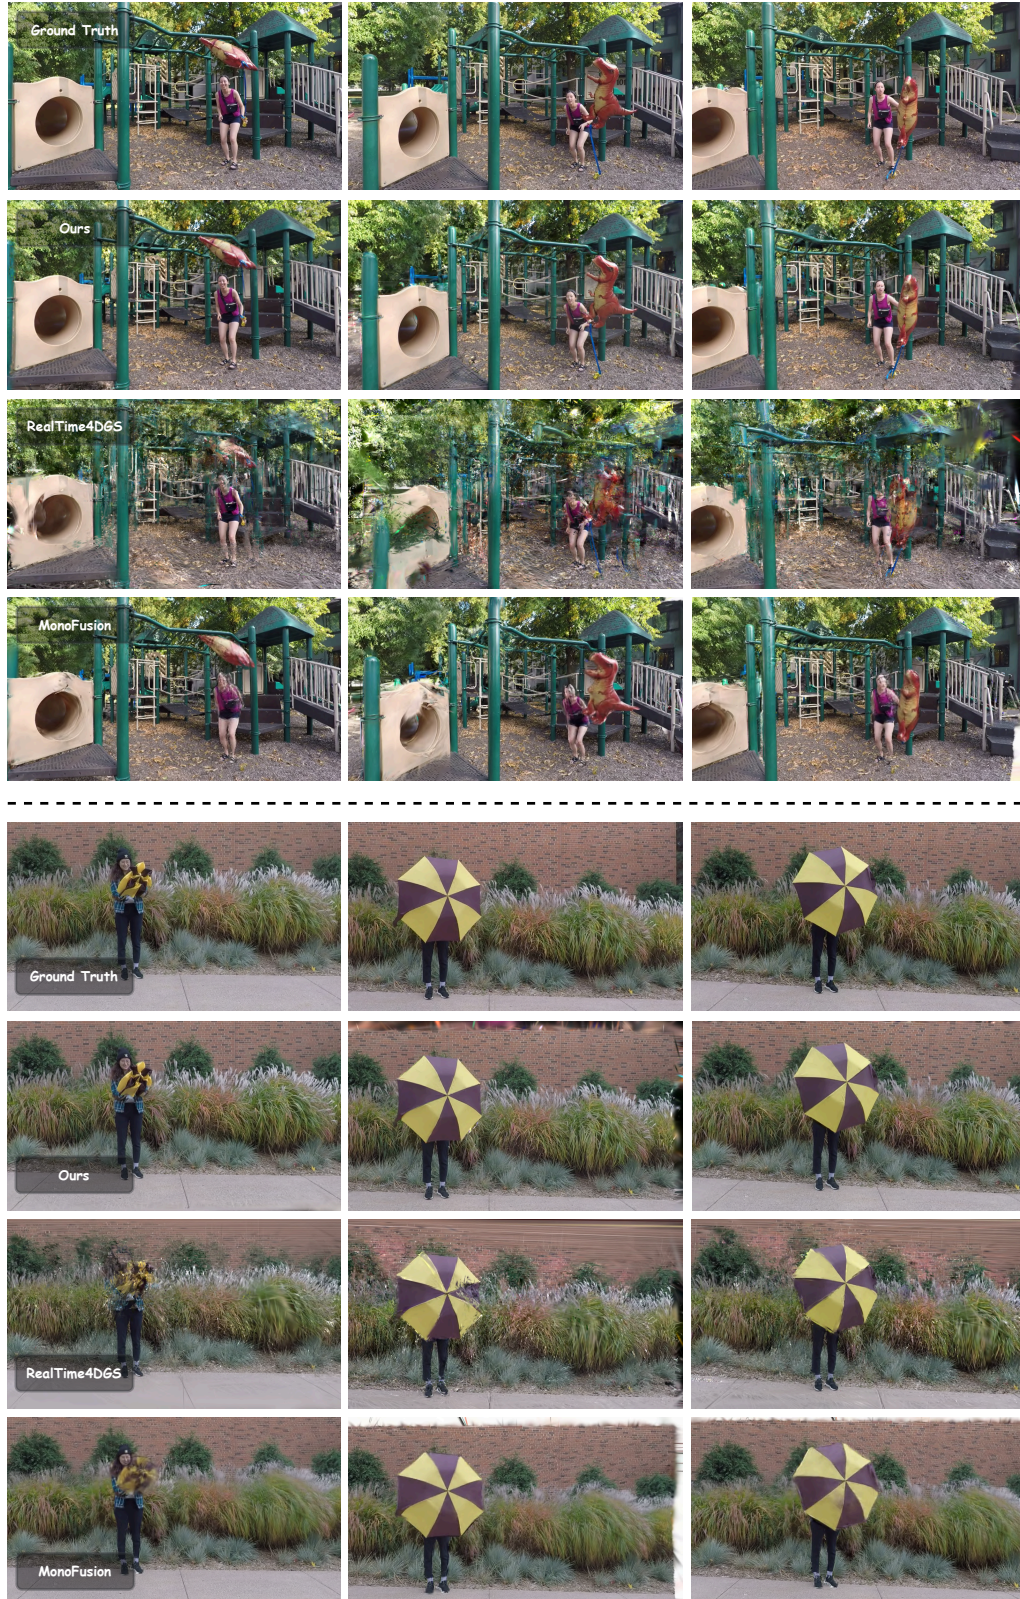

Figure 13: **Additional qualitative comparison results on Nvidia Dynamic Scenes Dataset (part I).** In the top panel, we emphasize the geometric completeness of the left archway and the right escalator across different viewpoints, as well as the temporal consistency of dynamic regions such as the human body, balloon, and the blue tether. In the bottom panel, we highlight the fine details of background grass, shoes, and umbrella textures, together with accurate motion fitting under fast movement in the leftmost column.



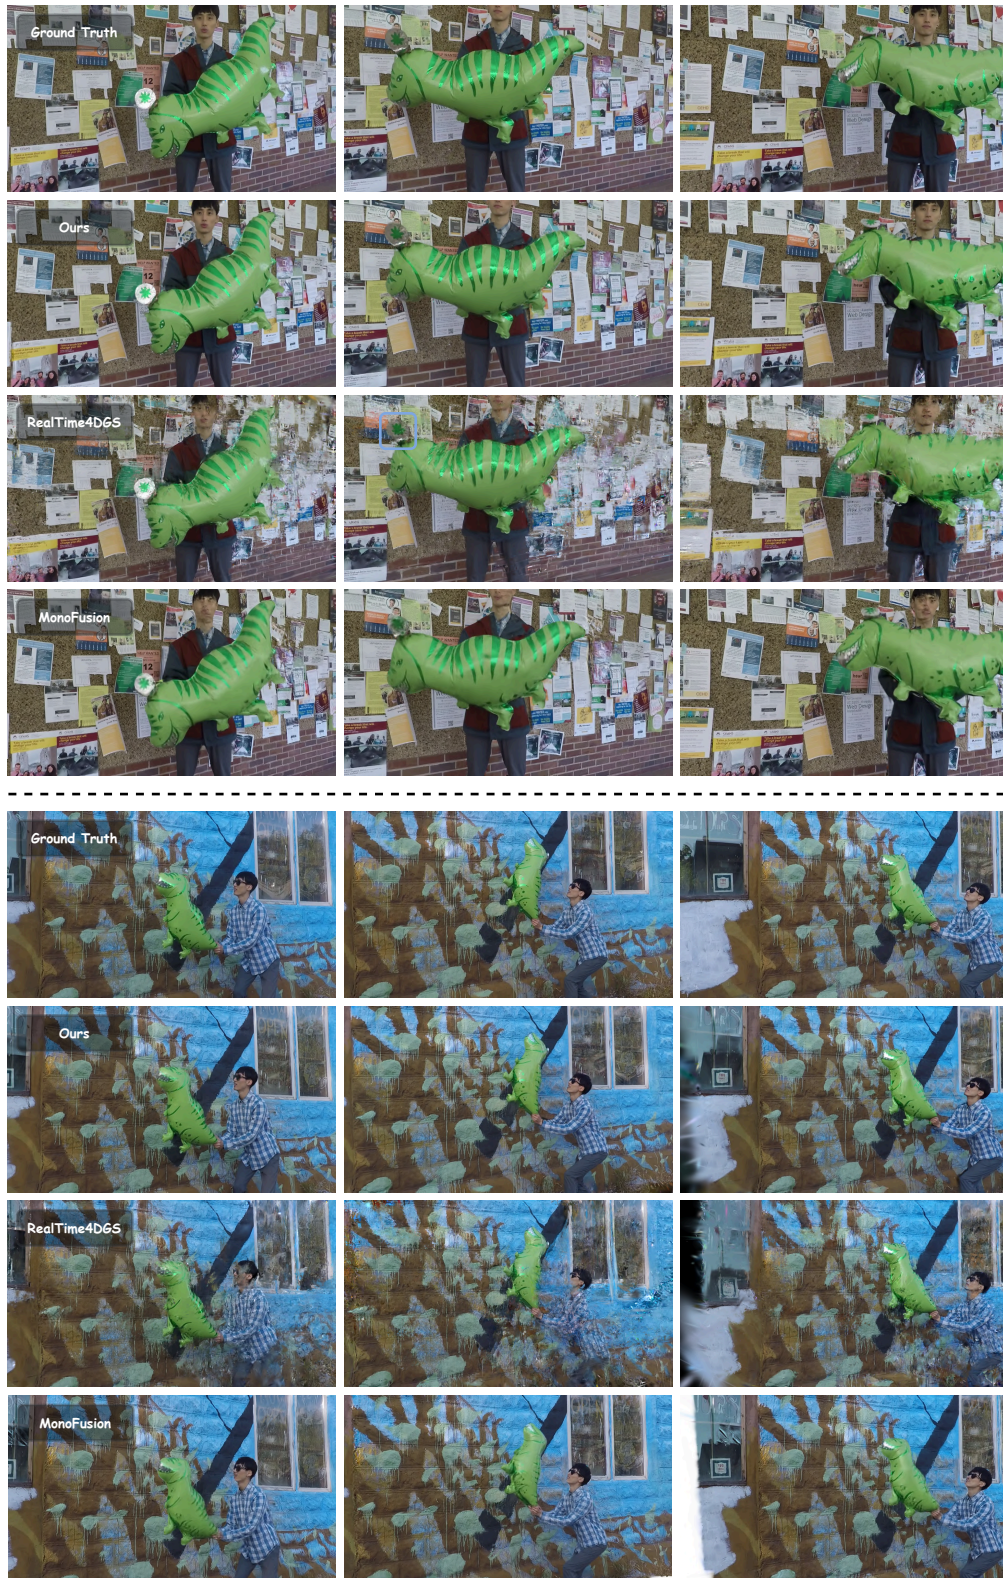

Figure 14: Additional qualitative comparison results on *Nvidia Dynamic Scenes Dataset (part II)*.



Table 7: **PSNR, SSIM, and LPIPS of our framework on Technicolor.** Three cameras (cam00, cam09 and cam15) are served as training views for scene *Fabien*, *Theater* and *Train*, while only two cameras (cam00 and cam15) are training views for scene *Birthday* and *Painter*.

| Technicolor - PSNR |        |         |        |          |         |         |
|--------------------|--------|---------|--------|----------|---------|---------|
|                    | Fabien | Theater | Train  | Birthday | Painter | Average |
| cam01              | 25.581 | 21.231  | 23.456 | 19.562   | 26.322  | 23.23   |
| cam02              | 21.886 | 19.203  | 21.202 | 18.227   | 25.736  | 21.251  |
| cam03              | 18.844 | 18.5    | 19.468 | 17.692   | 27.939  | 20.488  |
| cam04              | 28.676 | 23.089  | 23.59  | 20.991   | 27.423  | 24.754  |
| cam05              | 28.162 | 23.422  | 23.833 | 20.837   | 27.249  | 24.701  |
| cam06              | 23.838 | 20.949  | 21.0   | 19.824   | 25.58   | 22.238  |
| cam07              | 20.735 | 19.916  | 19.228 | 19.306   | 25.717  | 20.98   |
| cam08              | 28.175 | 23.997  | 23.649 | 20.245   | 25.817  | 24.377  |
| cam10              | 25.706 | 23.722  | 20.932 | 20.962   | 26.613  | 23.587  |
| cam11              | 24.939 | 23.549  | 21.013 | 21.682   | 27.519  | 23.741  |
| cam12              | 25.122 | 23.568  | 20.321 | 19.482   | 23.795  | 22.457  |
| cam13              | 27.505 | 25.954  | 21.626 | 20.643   | 26.436  | 24.433  |
| cam14              | 28.818 | 24.666  | 20.962 | 21.986   | 26.913  | 24.669  |
| Average            | 25.23  | 22.444  | 21.56  | 20.111   | 26.389  | 23.147  |

  

| Technicolor - SSIM |        |         |       |          |         |         |
|--------------------|--------|---------|-------|----------|---------|---------|
|                    | Fabien | Theater | Train | Birthday | Painter | Average |
| cam01              | 0.846  | 0.665   | 0.71  | 0.69     | 0.789   | 0.74    |
| cam02              | 0.801  | 0.609   | 0.638 | 0.634    | 0.803   | 0.697   |
| cam03              | 0.75   | 0.556   | 0.644 | 0.651    | 0.86    | 0.692   |
| cam04              | 0.835  | 0.697   | 0.726 | 0.715    | 0.823   | 0.759   |
| cam05              | 0.842  | 0.755   | 0.762 | 0.709    | 0.824   | 0.779   |
| cam06              | 0.821  | 0.675   | 0.658 | 0.682    | 0.784   | 0.724   |
| cam07              | 0.776  | 0.62    | 0.619 | 0.675    | 0.761   | 0.69    |
| cam08              | 0.81   | 0.725   | 0.741 | 0.683    | 0.787   | 0.749   |
| cam10              | 0.825  | 0.701   | 0.539 | 0.687    | 0.797   | 0.71    |
| cam11              | 0.82   | 0.687   | 0.665 | 0.726    | 0.826   | 0.745   |
| cam12              | 0.778  | 0.689   | 0.562 | 0.64     | 0.761   | 0.686   |
| cam13              | 0.83   | 0.781   | 0.657 | 0.669    | 0.819   | 0.751   |
| cam14              | 0.85   | 0.753   | 0.612 | 0.713    | 0.79    | 0.744   |
| Average            | 0.814  | 0.686   | 0.656 | 0.683    | 0.802   | 0.728   |

  

| Technicolor - LPIPS |        |         |       |          |         |         |
|---------------------|--------|---------|-------|----------|---------|---------|
|                     | Fabien | Theater | Train | Birthday | Painter | Average |
| cam01               | 0.305  | 0.355   | 0.24  | 0.245    | 0.218   | 0.273   |
| cam02               | 0.355  | 0.431   | 0.301 | 0.303    | 0.231   | 0.324   |
| cam03               | 0.394  | 0.484   | 0.328 | 0.319    | 0.218   | 0.349   |
| cam04               | 0.34   | 0.342   | 0.225 | 0.24     | 0.218   | 0.273   |
| cam05               | 0.323  | 0.329   | 0.214 | 0.253    | 0.221   | 0.268   |
| cam06               | 0.333  | 0.399   | 0.27  | 0.275    | 0.235   | 0.302   |
| cam07               | 0.367  | 0.447   | 0.307 | 0.291    | 0.266   | 0.336   |
| cam08               | 0.357  | 0.343   | 0.211 | 0.281    | 0.249   | 0.288   |
| cam10               | 0.307  | 0.36    | 0.266 | 0.259    | 0.24    | 0.287   |
| cam11               | 0.304  | 0.38    | 0.249 | 0.235    | 0.225   | 0.278   |
| cam12               | 0.404  | 0.387   | 0.315 | 0.323    | 0.266   | 0.339   |
| cam13               | 0.336  | 0.316   | 0.258 | 0.295    | 0.247   | 0.29    |
| cam14               | 0.287  | 0.347   | 0.255 | 0.241    | 0.238   | 0.274   |
| Average             | 0.34   | 0.379   | 0.264 | 0.274    | 0.236   | 0.299   |

Table 8: **PSNR, SSIM, and LPIPS of our framework on Neural 3D Video.** Three cameras (cam01, cam05 and cam10) are training views.

| Neural 3D Video - PSNR |                |              |                  |              |             |            |         |
|------------------------|----------------|--------------|------------------|--------------|-------------|------------|---------|
|                        | coffee martini | cook spinach | cut roasted beef | flame salmon | flame steak | sear steak | Average |
| cam00                  | 21.654         | 28.114       | 26.901           | 22.323       | 27.558      | 27.744     | 25.715  |
| cam02                  | 25.236         | 25.926       | 25.206           | 24.866       | 25.472      | 25.365     | 25.345  |
| cam03                  | -              | 25.194       | 24.231           | -            | 25.489      | 25.891     | 25.201  |
| cam04                  | 25.477         | 31.417       | -                | 25.741       | 31.034      | 30.641     | 28.862  |
| cam06                  | 20.31          | 27.966       | 26.145           | 21.048       | 27.624      | 27.609     | 25.117  |
| cam07                  | 19.602         | 26.638       | 24.25            | 20.449       | 25.344      | 25.759     | 23.674  |
| cam08                  | 19.134         | 26.957       | 24.089           | 19.889       | 26.177      | 26.647     | 23.816  |
| cam09                  | 20.957         | 26.997       | 26.072           | 21.31        | 27.161      | 27.446     | 24.99   |
| cam11                  | 14.669         | 20.251       | 19.145           | 15.398       | 19.277      | 19.349     | 18.015  |
| cam12                  | 13.623         | 19.353       | 18.495           | 14.841       | 18.082      | 18.604     | 17.166  |
| cam13                  | 15.547         | 20.289       | 20.071           | 16.839       | 19.371      | 20.014     | 18.688  |
| cam14                  | 16.705         | 22.012       | 22.252           | 17.309       | 20.462      | 21.098     | 19.973  |
| cam15                  | -              | 22.182       | 21.68            | 16.824       | 20.618      | 21.2       | 20.501  |
| cam16                  | 15.457         | 21.483       | 20.783           | 16.689       | 20.086      | 20.699     | 19.199  |
| cam17                  | -              | 22.11        | 20.975           | -            | 20.894      | 21.646     | 21.406  |
| cam18                  | 14.762         | 21.959       | 20.944           | 15.755       | 20.997      | 21.37      | 19.298  |
| cam19                  | 17.115         | 22.524       | 21.444           | 17.245       | 22.972      | 23.031     | 20.722  |
| cam20                  | 15.736         | 19.319       | 18.569           | 16.248       | 20.715      | 20.014     | 18.434  |
| Average                | 18.399         | 23.927       | 22.426           | 18.923       | 23.296      | 23.563     | 21.905  |

  

| Neural 3D Video - SSIM |                |              |                  |              |             |            |         |
|------------------------|----------------|--------------|------------------|--------------|-------------|------------|---------|
|                        | coffee martini | cook spinach | cut roasted beef | flame salmon | flame steak | sear steak | Average |
| cam00                  | 0.832          | 0.907        | 0.897            | 0.841        | 0.918       | 0.915      | 0.885   |
| cam02                  | 0.875          | 0.917        | 0.906            | 0.87         | 0.907       | 0.905      | 0.897   |
| cam03                  | -              | 0.919        | 0.893            | -            | 0.903       | 0.911      | 0.906   |
| cam04                  | 0.889          | 0.941        | -                | 0.884        | 0.945       | 0.94       | 0.92    |
| cam06                  | 0.767          | 0.898        | 0.862            | 0.774        | 0.899       | 0.894      | 0.849   |
| cam07                  | 0.735          | 0.876        | 0.814            | 0.754        | 0.859       | 0.861      | 0.816   |
| cam08                  | 0.735          | 0.874        | 0.8              | 0.754        | 0.874       | 0.87       | 0.818   |
| cam09                  | 0.786          | 0.892        | 0.868            | 0.8          | 0.893       | 0.892      | 0.855   |
| cam11                  | 0.673          | 0.751        | 0.712            | 0.643        | 0.735       | 0.723      | 0.706   |
| cam12                  | 0.65           | 0.717        | 0.684            | 0.627        | 0.689       | 0.69       | 0.676   |
| cam13                  | 0.67           | 0.772        | 0.76             | 0.676        | 0.756       | 0.753      | 0.731   |
| cam14                  | 0.726          | 0.815        | 0.804            | 0.719        | 0.792       | 0.787      | 0.774   |
| cam15                  | -              | 0.797        | 0.772            | 0.691        | 0.779       | 0.774      | 0.762   |
| cam16                  | 0.669          | 0.772        | 0.74             | 0.676        | 0.744       | 0.746      | 0.724   |
| cam17                  | -              | 0.772        | 0.728            | -            | 0.741       | 0.752      | 0.748   |
| cam18                  | 0.613          | 0.767        | 0.716            | 0.629        | 0.739       | 0.732      | 0.699   |
| cam19                  | 0.667          | 0.785        | 0.758            | 0.656        | 0.79        | 0.792      | 0.741   |
| cam20                  | 0.646          | 0.795        | 0.757            | 0.62         | 0.799       | 0.787      | 0.734   |
| Average                | 0.729          | 0.832        | 0.792            | 0.726        | 0.82        | 0.818      | 0.789   |

  

| Neural 3D Video - LPIPS |                |              |                  |              |             |            |         |
|-------------------------|----------------|--------------|------------------|--------------|-------------|------------|---------|
|                         | coffee martini | cook spinach | cut roasted beef | flame salmon | flame steak | sear steak | Average |
| cam00                   | 0.21           | 0.173        | 0.185            | 0.195        | 0.167       | 0.17       | 0.183   |
| cam02                   | 0.184          | 0.16         | 0.173            | 0.179        | 0.169       | 0.17       | 0.172   |
| cam03                   | -              | 0.169        | 0.186            | -            | 0.179       | 0.177      | 0.178   |
| cam04                   | 0.181          | 0.155        | -                | 0.17         | 0.151       | 0.151      | 0.161   |
| cam06                   | 0.25           | 0.183        | 0.207            | 0.235        | 0.179       | 0.182      | 0.206   |
| cam07                   | 0.273          | 0.183        | 0.223            | 0.252        | 0.191       | 0.192      | 0.219   |
| cam08                   | 0.266          | 0.182        | 0.222            | 0.249        | 0.178       | 0.18       | 0.213   |
| cam09                   | 0.219          | 0.15         | 0.168            | 0.204        | 0.146       | 0.147      | 0.172   |
| cam11                   | 0.37           | 0.317        | 0.339            | 0.372        | 0.326       | 0.329      | 0.342   |
| cam12                   | 0.388          | 0.324        | 0.346            | 0.387        | 0.344       | 0.343      | 0.355   |
| cam13                   | 0.358          | 0.281        | 0.291            | 0.347        | 0.286       | 0.292      | 0.309   |
| cam14                   | 0.313          | 0.252        | 0.261            | 0.312        | 0.259       | 0.264      | 0.277   |
| cam15                   | -              | 0.265        | 0.285            | 0.327        | 0.271       | 0.276      | 0.284   |
| cam16                   | 0.357          | 0.278        | 0.304            | 0.345        | 0.294       | 0.293      | 0.312   |
| cam17                   | -              | 0.274        | 0.308            | -            | 0.291       | 0.288      | 0.29    |
| cam18                   | 0.384          | 0.278        | 0.311            | 0.372        | 0.291       | 0.296      | 0.322   |
| cam19                   | 0.352          | 0.277        | 0.294            | 0.348        | 0.268       | 0.27       | 0.301   |
| cam20                   | 0.373          | 0.279        | 0.307            | 0.367        | 0.27        | 0.272      | 0.311   |
| Average                 | 0.298          | 0.232        | 0.259            | 0.291        | 0.237       | 0.238      | 0.258   |

Table 9: **PSNR, SSIM, and LPIPS of our framework on Nvidia Dynamic Scenes.** Three cameras (cam01, cam06 and cam10) are training views.

| Nvidia Dynamic Scenes - PSNR |         |          |          |            |         |          |         |
|------------------------------|---------|----------|----------|------------|---------|----------|---------|
|                              | jumping | balloon1 | balloon3 | playground | skating | umbrella | Average |
| cam02                        | 25.867  | 26.076   | 28.318   | 19.736     | 32.098  | 26.946   | 26.507  |
| cam03                        | 23.858  | 25.564   | 27.681   | 19.201     | 26.698  | 27.409   | 25.069  |
| cam04                        | 25.41   | 25.337   | 26.352   | 18.441     | 30.907  | 27.033   | 25.58   |
| cam05                        | 26.698  | 26.248   | 27.455   | 20.261     | 32.017  | 28.36    | 26.84   |
| cam07                        | 24.477  | 25.839   | 27.519   | 19.161     | 29.468  | 22.384   | 24.808  |
| cam08                        | 25.006  | 24.963   | 21.572   | 19.643     | 30.531  | 22.493   | 24.035  |
| cam09                        | 27.679  | 27.486   | 23.516   | 19.941     | 33.348  | 23.373   | 25.89   |
| cam11                        | 20.699  | 25.297   | 24.761   | 20.925     | 21.651  | 25.361   | 23.116  |
| cam12                        | 19.521  | 20.987   | 20.808   | 19.436     | 21.827  | 25.385   | 21.328  |
| Average                      | 24.357  | 25.311   | 25.331   | 19.638     | 28.727  | 25.416   | 24.807  |

  

| Nvidia Dynamic Scenes - SSIM |         |          |          |            |         |          |         |
|------------------------------|---------|----------|----------|------------|---------|----------|---------|
|                              | jumping | balloon1 | balloon3 | playground | skating | umbrella | Average |
| cam02                        | 0.818   | 0.848    | 0.878    | 0.695      | 0.93    | 0.822    | 0.832   |
| cam03                        | 0.756   | 0.82     | 0.88     | 0.626      | 0.826   | 0.818    | 0.788   |
| cam04                        | 0.802   | 0.814    | 0.845    | 0.617      | 0.908   | 0.807    | 0.799   |
| cam05                        | 0.858   | 0.845    | 0.832    | 0.699      | 0.934   | 0.84     | 0.835   |
| cam07                        | 0.78    | 0.83     | 0.848    | 0.625      | 0.919   | 0.758    | 0.793   |
| cam08                        | 0.814   | 0.795    | 0.519    | 0.67       | 0.931   | 0.686    | 0.736   |
| cam09                        | 0.875   | 0.87     | 0.81     | 0.69       | 0.949   | 0.8      | 0.832   |
| cam11                        | 0.784   | 0.836    | 0.805    | 0.74       | 0.894   | 0.813    | 0.812   |
| cam12                        | 0.65    | 0.635    | 0.699    | 0.684      | 0.865   | 0.799    | 0.722   |
| Average                      | 0.793   | 0.81     | 0.791    | 0.672      | 0.906   | 0.794    | 0.794   |

  

| Nvidia Dynamic Scenes - LPIPS |         |          |          |            |         |          |         |
|-------------------------------|---------|----------|----------|------------|---------|----------|---------|
|                               | jumping | balloon1 | balloon3 | playground | skating | umbrella | Average |
| cam02                         | 0.144   | 0.108    | 0.106    | 0.182      | 0.096   | 0.122    | 0.126   |
| cam03                         | 0.197   | 0.12     | 0.108    | 0.187      | 0.156   | 0.147    | 0.152   |
| cam04                         | 0.165   | 0.128    | 0.119    | 0.23       | 0.113   | 0.139    | 0.149   |
| cam05                         | 0.127   | 0.115    | 0.115    | 0.177      | 0.094   | 0.129    | 0.126   |
| cam07                         | 0.176   | 0.126    | 0.12     | 0.219      | 0.13    | 0.178    | 0.158   |
| cam08                         | 0.159   | 0.134    | 0.216    | 0.197      | 0.113   | 0.175    | 0.166   |
| cam09                         | 0.128   | 0.106    | 0.153    | 0.176      | 0.097   | 0.161    | 0.137   |
| cam11                         | 0.185   | 0.126    | 0.143    | 0.151      | 0.138   | 0.137    | 0.147   |
| cam12                         | 0.248   | 0.182    | 0.195    | 0.192      | 0.152   | 0.148    | 0.186   |
| Average                       | 0.17    | 0.127    | 0.142    | 0.19       | 0.121   | 0.148    | 0.15    |
